# Supplementary material for: Low-dose salinomycin induces anti-leukemic responses in AML and MLL
Source: PubMed Central journal article supplement (PMC5341990; doi:10.18632/oncotarget.11866), 2016-09-06
Supplement: oncotarget-07-73448-s001.pdf [file oncotarget-07-73448-s001.pdf]

## Low-dose salinomycin induces anti-leukemic responses in AML and MLL

### SUPPLEMENTARY MATERIALS AND METHODS

#### Apoptosis-based assays

Induction of apoptosis was assessed by measurement of caspase 3/7 activity or Annexin V staining. Caspase activity was evaluated using the Caspase-Glo® 3/7 luminescent assay system (Promega, Madison, WI, USA) as per the manufacturer's instructions for suspension cells. Membrane changes associated with the onset of programmed cell death were evaluated using an apoptosis detection kit (Annexin V-FITC protein, PI; eBioscience, Inc., San Diego, CA, USA), as per manufacturer's instructions, and subsequent measurement using a LSR II flow cytometer (BD Biosciences). Histogram plots were obtained and analyzed using Cyflogic software (CyFlo Ltd, Turku, Finland).

#### Western blot analysis

Total cell lysates were prepared after incubation of leukemic cells in media containing vehicle (0.01% DMSO) or salinomycin at the indicated dosage and

time, using an SDS extraction protocol (Cell Signaling Technology, Danvers, MA, <http://www.cellsignal.com>). Proteins were separated by SDS-PAGE and probed with Atg7 (D12B11) and Beclin-1 (D40C5) at 1:1000 dilutions both from Cell Signaling. Protein loading was assessed using a mouse monoclonal  $\beta$ -actin primary antibody (1:5,000; Sigma-Aldrich, St Louis, MO). Blots were developed with a chemiluminescence detection system (Immobilon Western Chemiluminescent HRP Substrate; MerckMillipore, Billerica, MA), exposed to X-ray film (SLS/MOL 7016, Analab, Lisburn, U.K.) for up to 10 minutes, developed, and images were obtained using an Auto-Chemi Imaging system (UVP, Upland, CA).

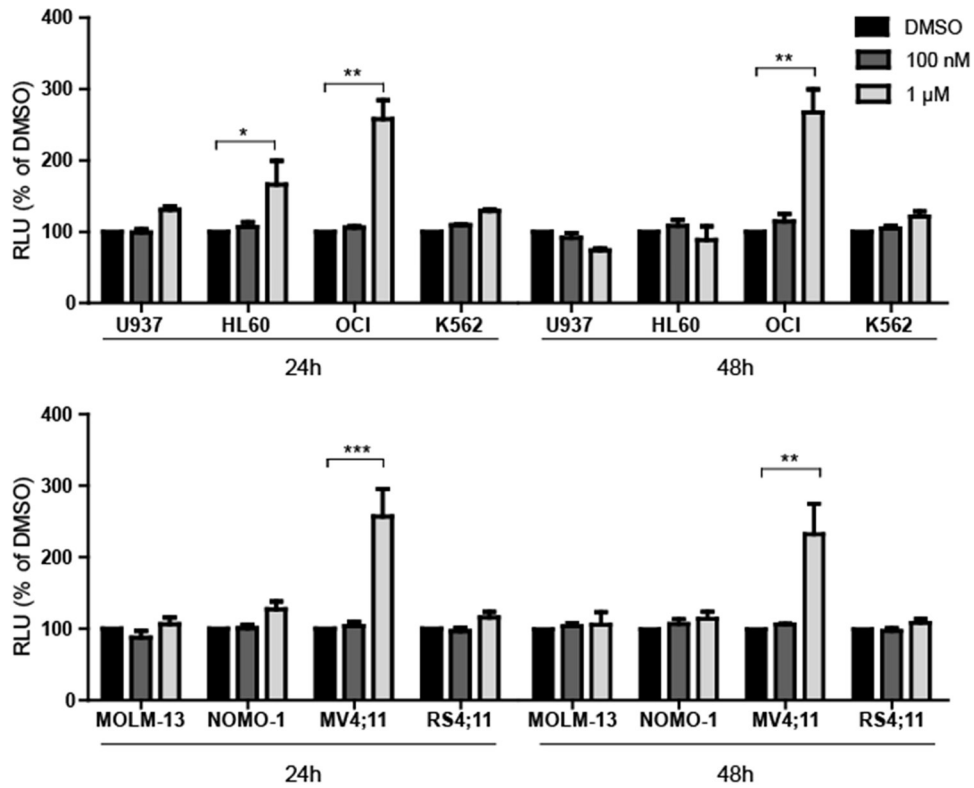

**Supplementary Figure S1: Caspase 3/7 activity in AML and MLLr cell lines.** Bar graphs showing increased caspase 3/7 activity, as relative luminescence units (RLU) compared to 0.01% DMSO control, following salinomycin treatment (1 μM) is limited to HL60 (24 hours), OCI-AML3 and MV4;11 human cell lines (24 and 48 hours). Mean values ± S.E.M. of biological replicates (n=3) are plotted. \*\*\*P < 0.001, \*\*P < 0.01, \*P < 0.05, t-test.

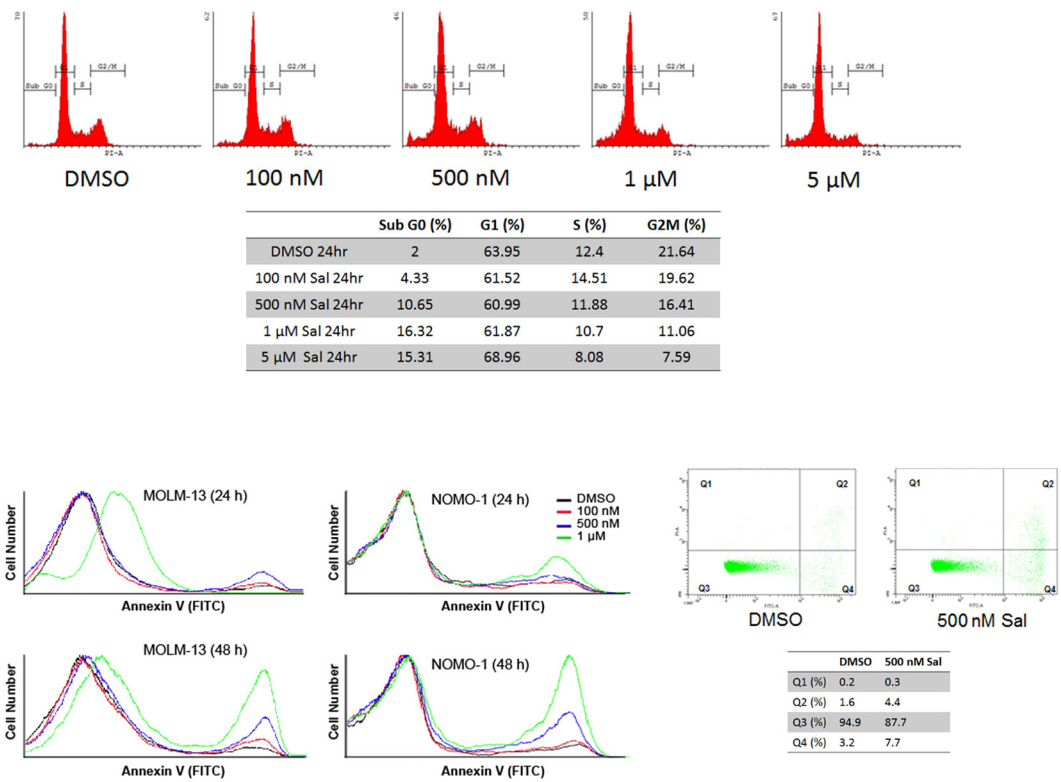

**Supplementary Figure S2: Salinomycin increases the Sub G0 fraction and induces Annexin-V expression in MLL-AF9 cell lines.** Representative histogram plots following propidium iodide (PI) staining of MOLM-13 cells treated with vehicle (DMSO) or salinomycin for 24 hours at the indicated concentration with associated table depicting percentage of cells in each phase of the cell cycle (upper panel). Overlay histogram plots and representative gating strategy showing increased Annexin-V (FITC) in salinomycin versus DMSO treated human MLL-AF9 cell lines (lower panel). Representative of biological replicates (n=3).

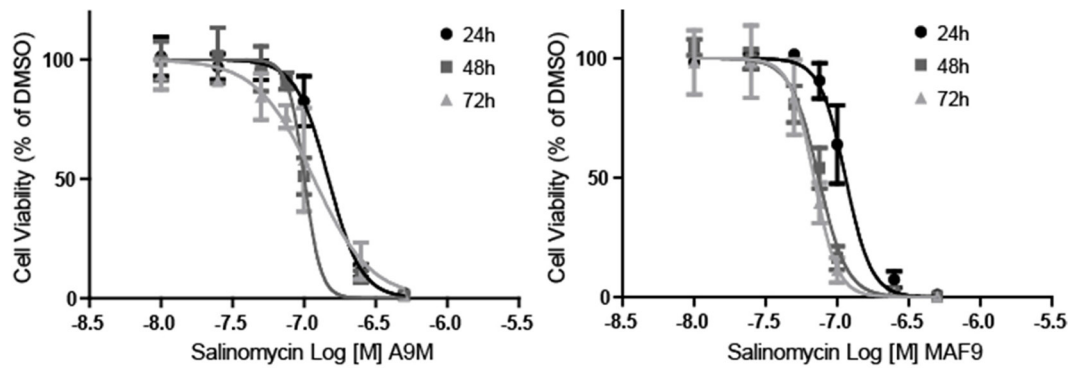

| Cell Line | IC50 (nM) |         |         |
|-----------|-----------|---------|---------|
|           | 24 hour   | 48 hour | 72 hour |
| A9M       | 148       | 101     | 117     |
| MAF9      | 114       | 74      | 69      |

**Supplementary Figure S3: Dose response curves of salinomycin treated primary murine leukaemia cell lines.** Dose-response curves plotting cell viability, compared to 0.01% DMSO, against log-transformed salinomycin concentration after 24, 48, and 72 hours. Estimated IC50 values (tabulated above) were obtained from dose-response curves. The 48 hour IC50 values formed the basis for the treatment regimen of MAF9 cells prior to Illumina BeadArray analysis. Mean values  $\pm$  S.E.M. of biological replicates (n=3) are plotted.

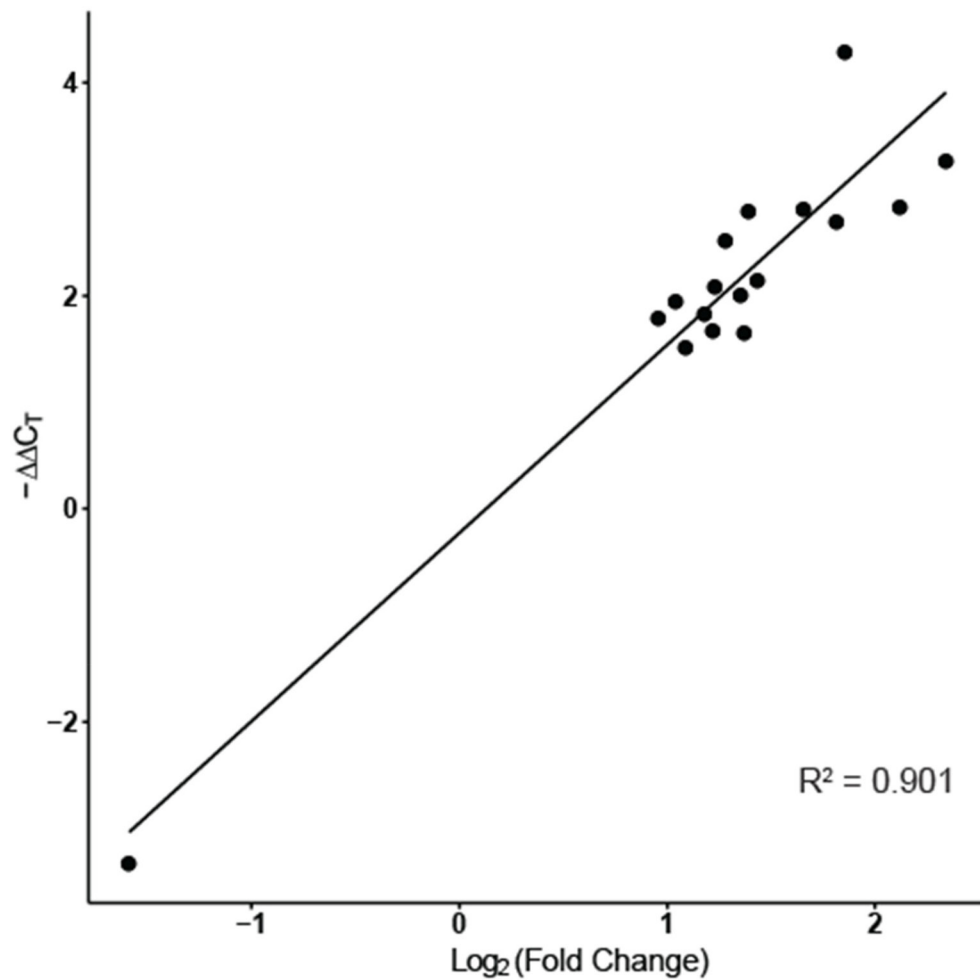

**Supplementary Figure S4: Correlation of Illumina BeadArray and qRT-PCR salinomycin 17-gene signature.** Scatter graph showing highly significant correlation in expression of the salinomycin 17-gene signature, depicted by a linear regression coefficient ( $R^2 = 0.901$ ) between values obtained from Illumina BeadArray  $\text{Log}_2(\text{Fold Change})$  and qRT-PCR  $-\Delta\Delta C_T$  platforms.

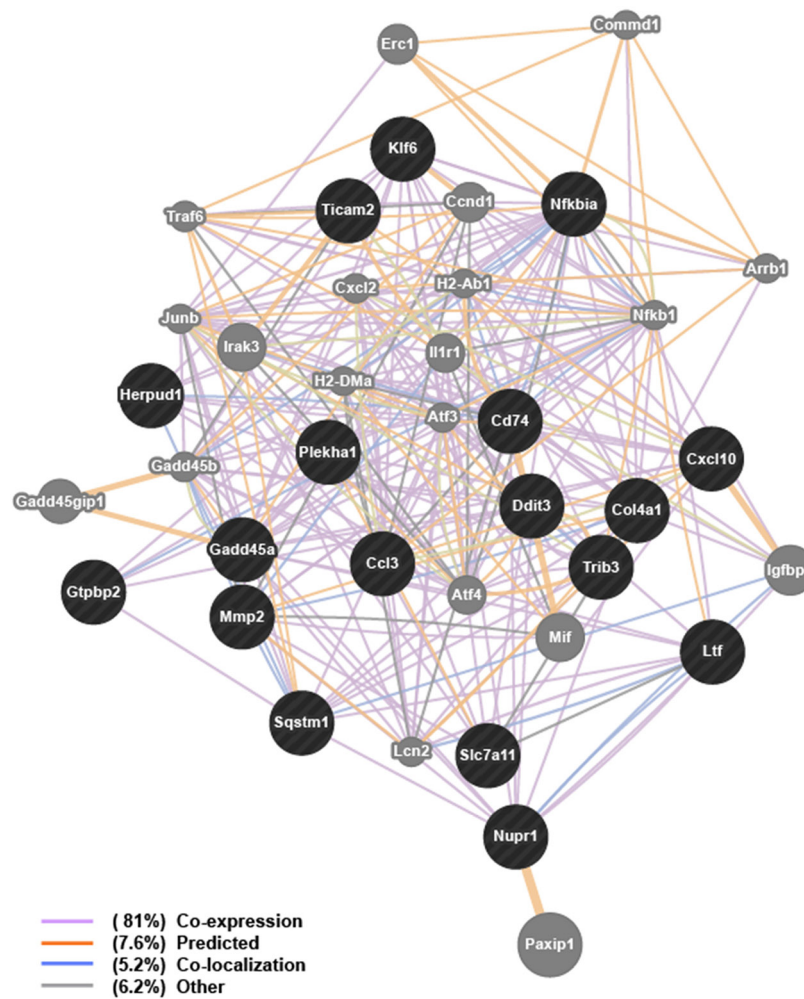

| Function                                                        | FDR      | Coverage |
|-----------------------------------------------------------------|----------|----------|
| positive regulation of immune response                          | 4.37E-08 | 11(292)  |
| response to molecule of bacterial origin                        | 1.53E-07 | 9 (180)  |
| cellular response to biotic stimulus                            | 1.53E-07 | 8(113)   |
| cellular response to lipopolysaccharide                         | 1.35E-06 | 7(93)    |
| response to lipopolysaccharide                                  | 1.42E-06 | 8(161)   |
| cellular response to molecule of bacterial origin               | 1.62E-06 | 7(101)   |
| positive regulation of defense response                         | 3.19E-06 | 8(186)   |
| cellular response to lipid                                      | 3.74E-06 | 8(193)   |
| positive regulation of protein serine/threonine kinase activity | 5.77E-06 | 8(207)   |

**Supplementary Figure S5: Functional networks identified by GeneMania.** GeneMania identified nine functional networks for the salinomycin 17-gene signature including positive regulation of immune response and protein serine/threonine kinase activity, with FDR < 10<sup>-5</sup>.

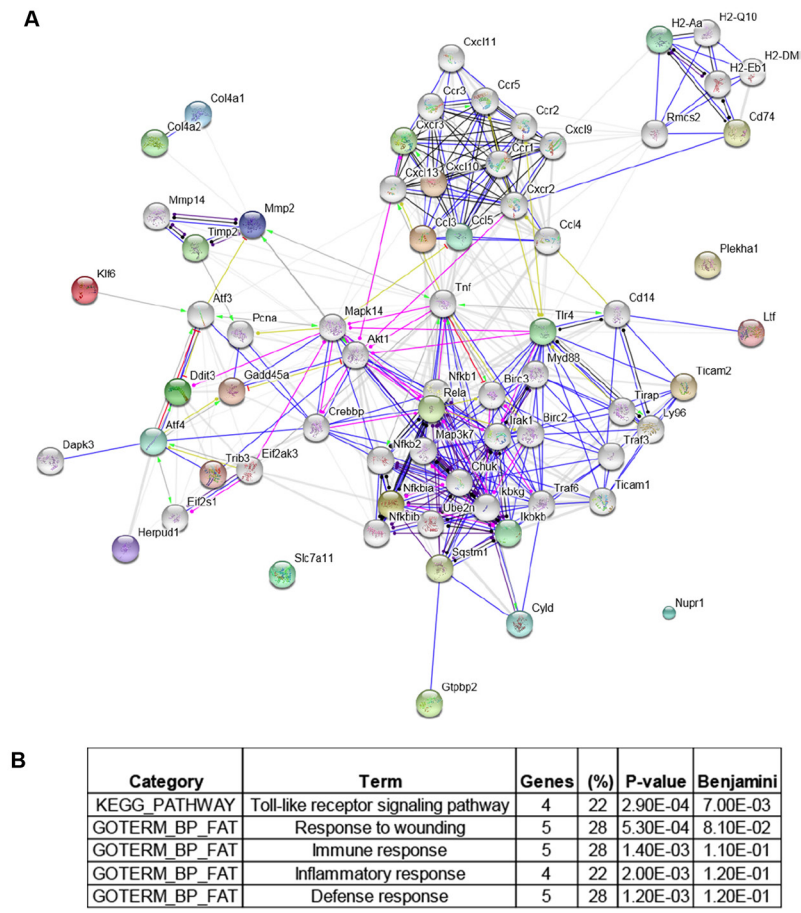

**Supplementary Figure S6: STRING and DAVID analysis of the salinomycin 17-gene signature.** **A.** Submission of the salinomycin 17-gene signature to STRING generated three primary hubs (NFκB, chemokine, and DNA repair) centrally connected by Tnf, Mapk14, and Akt1. **B.** Gene Ontology analysis of the salinomycin 17-gene signature by DAVID identified the Toll-like receptor signaling pathway as being altered in MAF9 cells.

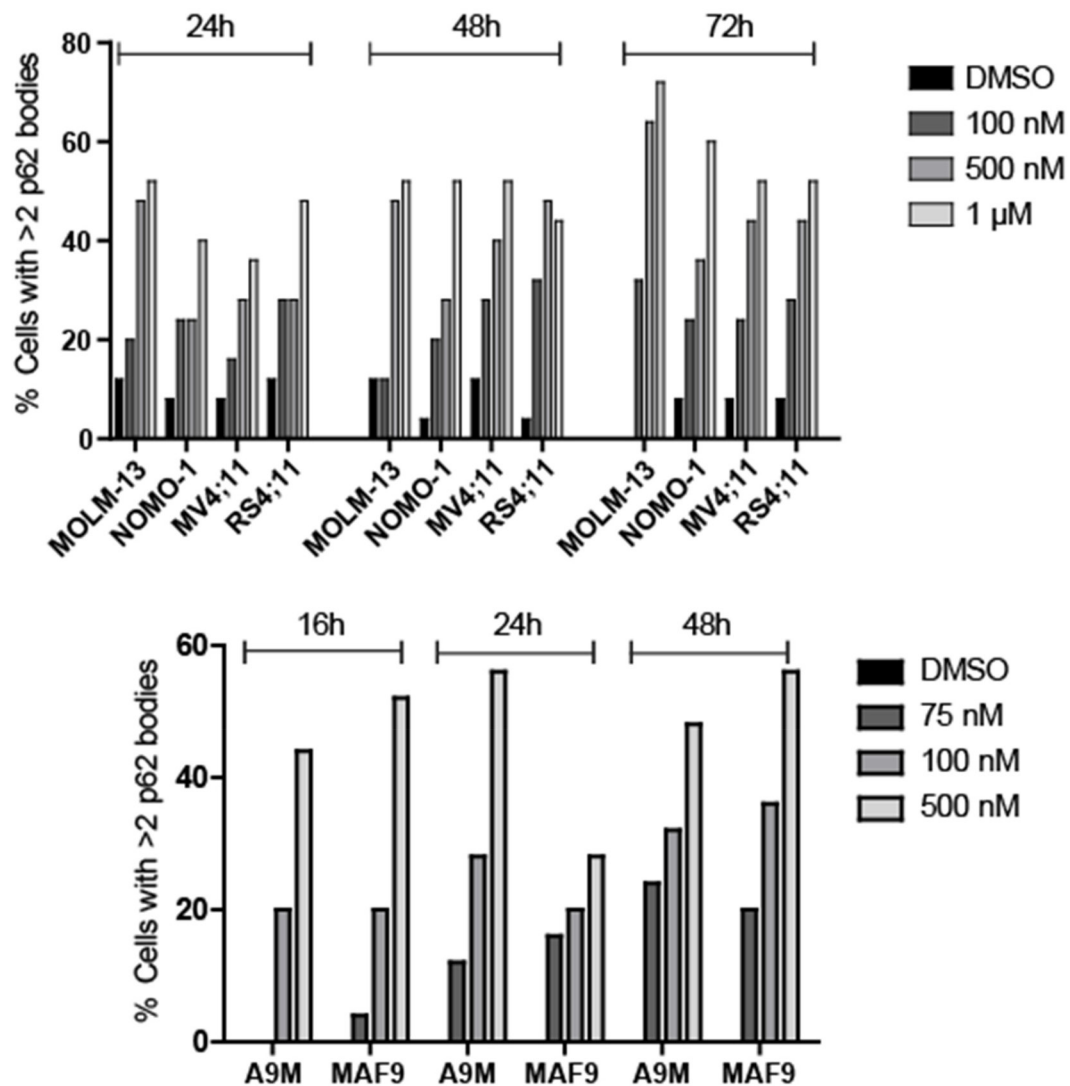

**Supplementary Figure S7: Quantitative scoring of p62/SQSTM1 aggresomes in cell lines.** Bar graphs showing quantitative scoring of p62/SQSTM1 aggresomes in both human (upper panel) and primary murine (lower panel) cell lines. Twenty-five cells per condition were examined and percentage of cells with greater than two p62/SQSTM1 positive aggresomes calculated and plotted.



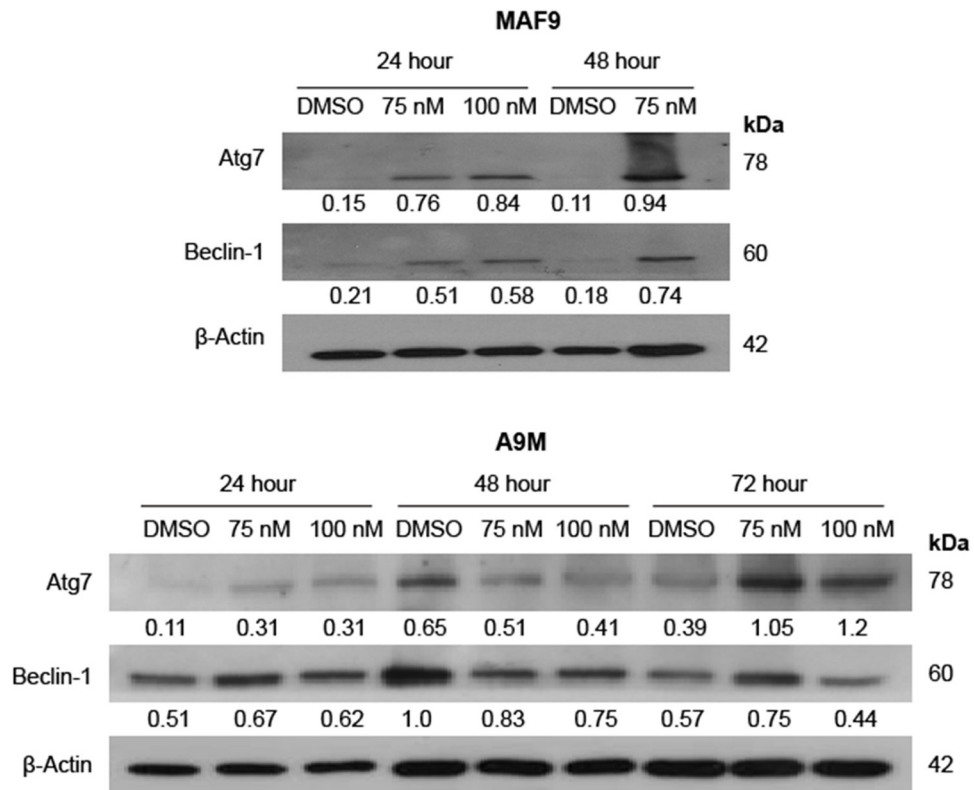

**Supplementary Figure S8: Salinomycin-treated A9M and MAF9 cells expressed differential levels of autophagy-associated proteins.** Representative western blot analysis demonstrating marked increased expression of the autophagy related proteins Atg-7 and Beclin-1 in salinomycin-treated MAF9 cells (upper panel) and more moderate increase in A9M cells (lower panel) compared to  $\beta$ -actin loading control. Densitometry analysis was performed using Image Studio Lite Version 5.2 (LI-COR [www.licor.com/bio/products/software/image\\_studio\\_lite](http://www.licor.com/bio/products/software/image_studio_lite)).

Supplementary Table S1: Calculated IC50 values for salinomycin treatment for human cell lines

| Cell Line | IC50 ( $\mu\text{M}$ ) |                 |
|-----------|------------------------|-----------------|
|           | 24 hour                | 48 hour         |
| U937      | 25.5 $\pm$ 3.5         | 1.8 $\pm$ 0.5   |
| HL60      | 15 $\pm$ 2.2           | 0.83 $\pm$ 0.1  |
| OCI-AML3  | 1.38 $\pm$ 0.3         | 0.42 $\pm$ 0.05 |
| K562      | 22.5 $\pm$ 3.4         | 1.65 $\pm$ 0.4  |
| NB4       | 13.1 $\pm$ 1.6         | 0.36 $\pm$ 0.03 |
| MOLM-13   | 6.3 $\pm$ 0.5          | 1.0 $\pm$ 0.2   |
| NOMO-1    | 3.3 $\pm$ 0.4          | 0.75 $\pm$ 0.1  |
| MV4;11    | 2.6 $\pm$ 0.6          | 0.55 $\pm$ 0.1  |
| RS4;11    | 6.6 $\pm$ 0.6          | 1.4 $\pm$ 0.4   |

Excel spreadsheet showing the calculated IC50s for salinomycin treatment of AML and MLLr cell lines for 24 and 48 hours as measured by Cell Titre Glo™ cell viability assays.

**Supplementary Table S2: Gene expression analysis of MAF9 cells. Excel spreadsheet showing absolute fluorescence intensities for 24,326 probes from the Mouse Ref-8 v.2 Illumina BeadArray normalized by quantile method using *beadarray* R package. Values for salinomycin or 0.01% DMSO treatment of MAF9 cells are presented**

See Supplementary File 1

**Supplementary Table S3: Salinomycin signature  $P < 0.001$ . Excel spreadsheet showing the 21 Illumina probes constituting the salinomycin 17-gene signature plus *Col4a1*. Probes are labelled by their Illumina ID, ID symbol, ID gene name and Entrez ID. Probes are ranked based on their B-statistic (log-odds) for salinomycin treatment versus control and those with adjusted P values  $< 0.001$  are highlighted (boxed)**

See Supplementary File 2

Supplementary Table S4: Salinomycin 17-gene signature, primer sequences and amplicons

| Gene Name | Primer Sequence (5' - 3') |                         | Amplicon Length |
|-----------|---------------------------|-------------------------|-----------------|
|           | Forward                   | Reverse                 |                 |
| Ddit3     | CTGGAAGCCTGGTATGAGGAT     | CAGGGTCAAGAGTAGTGAAGGT  | 121             |
| Gadd45a   | CCGAAAGGATGGACACGGTG      | TTATCGGGGTCTACGTTGAGC   | 121             |
| Sqstm1    | AGGATGGGGACTTGGTTGC       | TCACAGATCACATTGGGGTGC   | 178             |
| Col4a1    | CTGGCACAAAAGGGACGAG       | ACGTGGCCGAGAATTTACC     | 238             |
| Trib3     | GCAAAGCGGCTGATGTCTG       | AGAGTCGTGGAATGGGTATCTG  | 77              |
| Mmp2      | CAAGTTCCCCGGCGATGTC       | TTCTGGTCAAGGTCACCTGTC   | 171             |
| Ltf       | TGAGGCCCTTGGACTCTGT       | ACCCACTTTTCTCATCTCGTTC  | 112             |
| Plekha1   | CAAGGTCCAGACTGTCTCTCC     | CCCTGAGGGCCGTTTTTACTC   | 90              |
| Slc7a11   | GGCACCGTCATCGGATCAG       | CTCCACAGGCAGACCAGAAAA   | 100             |
| Cxcl10    | CCAAGTGCTGCCGTCATTTTC     | GGCTCGCAGGGATGATTTCAA   | 157             |
| Gtpbp2    | GGAACAGAGGAGGTAAAGCCA     | GCTCAAAGCGGTACTGAGATG   | 111             |
| Herpud1   | GCAGTTGGAGTGTGAGTCG       | TCTGTGGATTCAGCACCCTTT   | 229             |
| Ticam2    | CGATCAAGACGGCCATGAGTC     | CTCGTCGGTGTTCATCTTCTGC  | 199             |
| Nupr1     | CCCTTCCCAGCAACCTCTAAA     | TCTTGGTCCGACCTTTCCGA    | 116             |
| Klf6      | GTTTCTGCTCGGACTCCTGAT     | TTCCTGGAAGATGCTACACATTG | 108             |
| Cd74      | AGTGCGACGAGAACGGTAAC      | CGTTGGGGAACACACACCA     | 78              |
| Nfkbia    | TGAAGGACGAGGAGTACGAGC     | TTCGTGGATGATTGCCAAGTG   | 146             |
| Ccl3      | TTCTCTGTACCATGACACTCTGC   | CGTGGAATCTTCCGGCTGTAG   | 100             |

Excel spreadsheet showing the named genes within the salinomycin 17-gene signature with the primer sequences and amplicon lengths for the products obtained by qRT-PCR.
